# Supplementary material for: Size-resolved morphological properties of the high Arctic summer aerosol during ASCOS-2008
Source: Copernicus journal article supplement (doi:10.5194/acp-16-6577-2016), 2016-05-31
Supplement: Supplementary file 1 [file acp-16-6577-2016-supplement.pdf]

Supplement of Atmos. Chem. Phys., 16, 6577–6593, 2016  
<http://www.atmos-chem-phys.net/16/6577/2016/>  
doi:10.5194/acp-16-6577-2016-supplement  
© Author(s) 2016. CC Attribution 3.0 License.

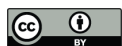

Atmospheric  
Chemistry  
and Physics  
Open Access  
EGU

*Supplement of*

## **Size-resolved morphological properties of the high Arctic summer aerosol during ASCOS-2008**

**Evelyne Hamacher-Barth et al.**

*Correspondence to:* Evelyne Hamacher-Barth (evelyne@misu.su.se)

The copyright of individual parts of the supplement might differ from the CC-BY 3.0 licence.

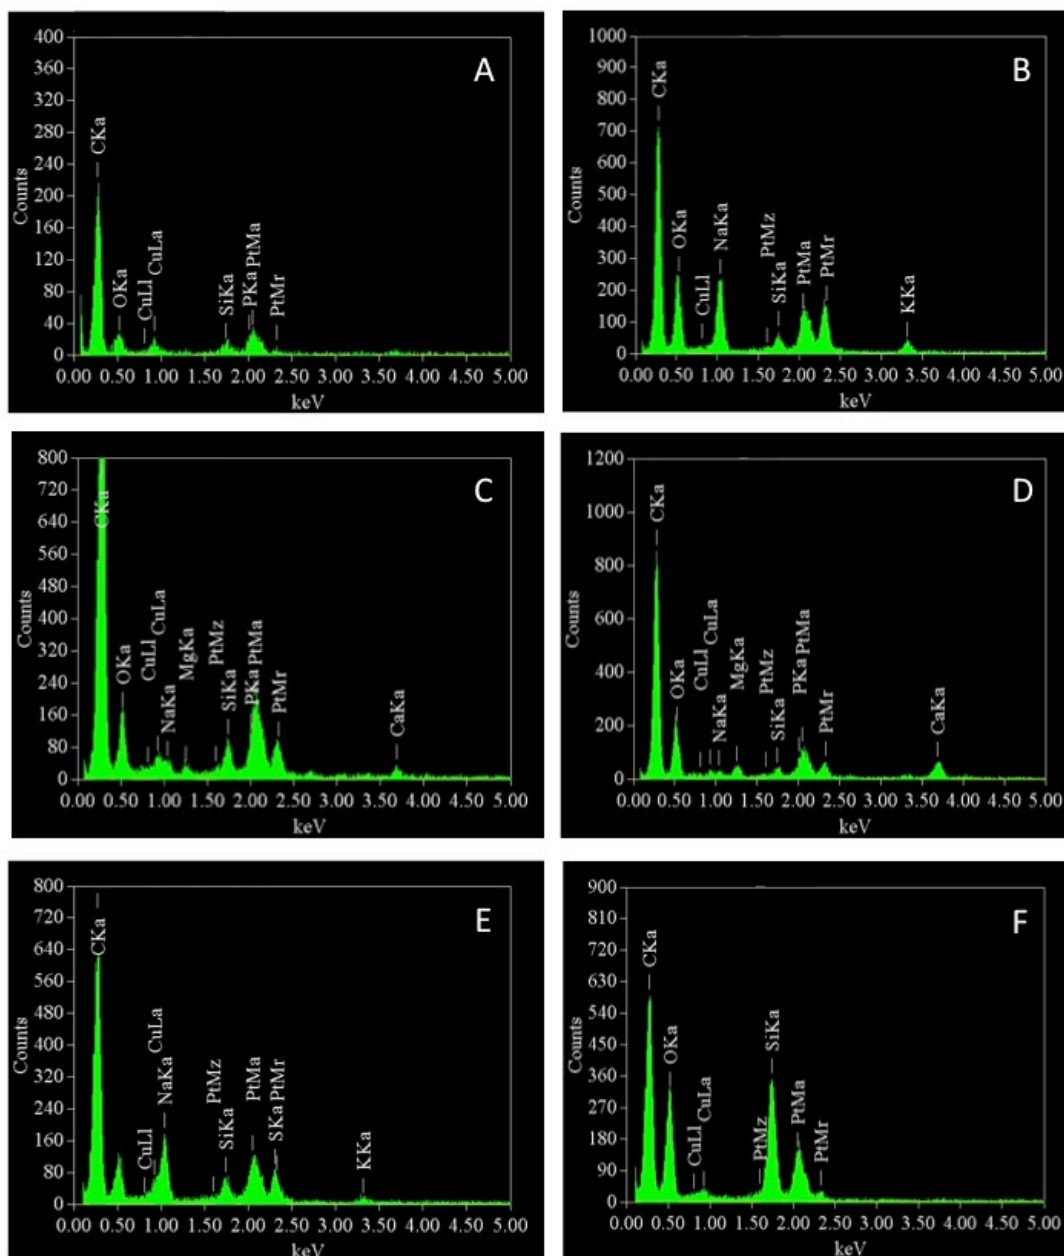

Figure S1: Examples of EDX spectra of aerosol particle investigated in this study: (A) single particle containing neither  $\text{Na}^+/\text{K}^+$  nor  $\text{Ca}^{2+}/\text{Mg}^{2+}$ ; (B) "aggregate" particle containing  $\text{Na}^+/\text{K}^+$ ; (C) "aggregate with film" particle containing  $\text{Na}^+$  and minor contents of  $\text{Ca}^{2+}/\text{Mg}^{2+}$ ; (D) "mucus-like" particle containing  $\text{Ca}^{2+}/\text{Mg}^{2+}$  and minor contents of  $\text{Na}^+$ ; (E) halo particle containing  $\text{Na}^+/\text{K}^+$  and S probably in the satellite particles; (F) blank spectrum taken from a Pt-shadowed TEM grid.
